# Supplementary material
Source: PubMed Central journal article supplement (PMC10770380)
Supplement: 41422_2023_909_MOESM1_ESM.pdf [file 41422_2023_909_MOESM1_ESM.pdf]

## 1 **Supplementary Methods**

### 2 **CYT score**

3 The cytolytic (CYT) score was calculated as previously described as the  
4 geometric mean of granzyme (GZMA) and perforin (PRF1) expression.<sup>1</sup>

5

### 6 **Evaluation of TILs**

7 We evaluated tumor-infiltrating lymphocytes (TILs) on H&E slides according to  
8 the International TIL Working Group guidelines.<sup>2</sup> According to the guidelines,  
9 TILs are defined as mononuclear immune cells that infiltrate the tumor region  
10 (including lymphocytes and plasma cells, excluding polymorphonuclear  
11 leukocytes). The TILs were reported as the ratio of the area occupied by  
12 lymphocytes to the total area of the tumor region and recorded in 5%  
13 increments. Two experienced pathologists independently evaluated the  
14 histopathological results.

15

### 16 **Pull-down assay**

17 The ZNF689 and TRIM28 fusion proteins were purchased from Proteintech.  
18 The pull-down assays were performed as previously described.<sup>3</sup> Briefly, 2 µg of  
19 glutathione S-transferase (GST)-tagged ZNF689 and 2 µg of His-tagged  
20 TRIM28 recombinant protein were incubated with an anti-GST antibody in  
21 binding buffer (50 mM Tris (pH 7.5), 150 mM NaCl, 0.05% NP-40,  
22 supplemented with a protease inhibitor cocktail) overnight at 4°C and then  
23 mixed with Dynabeads Protein A beads (Invitrogen) for 1 h. The beads were  
24 washed 5 times and eluted with SDS loading buffer by boiling for 5 min before  
25 electrophoresis. For His pull-down, 2 µg of His-tagged TRIM28 and 2 µg of

1 GST-tagged ZNF689 recombinant protein were incubated with Ni-NTA beads in  
2 binding buffer overnight at 4°C. After centrifugation, the beads were washed 5  
3 times and boiled in 1 × SDS gel loading buffer before electrophoresis.

4

#### 5 **ATAC-seq and data analysis**

6 ATAC-seq was performed as previously described with modifications.<sup>4</sup> For  
7 nuclear preparation, 100,000 live cells were lysed in cold lysis buffer (10 mM  
8 Tris-Cl, pH 7.4, 10 mM NaCl, 3 mM MgCl<sub>2</sub> and 0.1% IGEPAL CA-630) before  
9 being washed at 500 × g for 10 min. For transposition, transposase reaction  
10 mix (25 µl 2× TD buffer, 2.5 µl transposase (APEX<sub>BIO</sub>) and 22.5 µl of nuclease  
11 free water) was used in the transposase reaction carried out for 30 min at 37°C.  
12 After DNA purification, the library was amplified for 12 cycles and sequenced  
13 using Illumina NextSeq 500 with paired-end 2 × 150 as the sequencing mode.

14 Sequencing reads were trimmed using Fastp (v0.20.0) with the parameter  
15 'length\_required 80'. Subsequently, the processed reads were aligned to the  
16 human genome (hg19) using Bowtie2, employing the parameters 'very  
17 sensitive X 2000'. Reads mapped to the mitochondria were subsequently  
18 excluded. PCR duplicates were eliminated using the Picard tool  
19 (<https://broadinstitute.github.io/picard/>). Peak calling was executed with  
20 MACS2 (v2.2.7.1), using the parameters 'nomodel shift 100 extsize 200 keep  
21 dup all'. For subsequent analyses, read counts were normalized using the  
22 RPKM method. ATAC signal profiles were illustrated using deepTools. For the  
23 LINE-1 analysis, the UCSC hg19 r1\_repeat\_rmsk dataset specific to LINE-1  
24 was employed to assess LINE-1 enrichment. Visualization of ATAC-seq signals  
25 was achieved with the Integrative Genomics Viewer (IGV), and differential peak

1 analysis was conducted using DiffBind.

2

### 3 **Dual-luciferase reporter assay**

4 Cells were seeded in 24-well plates and transfected with 0.5 µg/well luciferase  
5 reporter plasmids. To normalize the transfection efficiency, the cells were  
6 cotransfected with 10 ng of pRL-CMV (Renilla luciferase). Forty-eight hours  
7 after transfection, luciferase activity was detected using the Dual-Luciferase  
8 Reporter Assay System Kit (Promega) according to the manufacturer's  
9 instructions.

10

### 11 **Metaphase chromosome spreading**

12 Cells at 70% confluence were treated for 2 h with 1 mg/ml colcemid, harvested,  
13 and resuspended for 30 min in 1 ml of 75 mmol/l KCl at 37°C. After  
14 centrifugation, the cells were fixed with cold methanol/acetic acid (3:1) buffer  
15 and incubated for 15 min at room temperature. Metaphase spreads were made  
16 by dropping cells onto the slide, and the specimens were air-dried, stained with  
17 DAPI, and visualized under a Zeiss AxioImager microscope.

18

### 19 **CIN score calculation**

20 CIN score calculation was performed as previously described.<sup>5</sup> In brief, the  
21 average of the normalized gene expression data of the 70 genes that constitute  
22 the signature was used to calculate the CIN score.

23

### 24 **Evaluation of chromosome missegregation errors in H&E samples**

25 Diagnostic H&E-stained TNBC samples in the FUSCC cohort were evaluated

1 for anaphase chromosome missegregation events using a 100× objective light  
2 microscope. Only H&E sections with ≥10 cells undergoing anaphase were  
3 considered.

4

### 5 **Aneuploidy score calculation**

6 The aneuploidy score was defined as the total number of arm-level SCNAs for  
7 a tumor, adjusted for ploidy and was calculated using a total copy number-  
8 based method as previously described.<sup>6</sup> Specifically, the segment file with  
9 ploidy information generated by ASCAT (v.2.5.2) was used as input for the  
10 “get\_Aneuploidy\_score()” function of the sigminer package to assign  
11 aneuploidy scores to each sample.<sup>7</sup>

12

### 13 **Apoptosis assay**

14 Apoptosis analysis was performed with Annexin V-Alexa Fluor 647/PI Apoptosis  
15 Detection Kit (Yeasen). Briefly, cells and osteoclasts were seeded in 6-well  
16 plates ( $2 \times 10^5$  cells). After 24 h of incubation, the cells were treated with EFV  
17 for 24 h. The floating and adherent cells were harvested and doubly stained  
18 with Annexin V-Alexa Fluor 647 and PI based on the manufacturer's instructions,  
19 and then analyzed using CytoFLEX S flow cytometer (Beckman Coulter).

20

### 21 **Splenocyte isolation and CD8<sup>+</sup> T-cell isolation**

22 OT-I mice were killed by cervical dislocation, and spleens were collected into  
23 50 ml conical tubes containing serum-free RPMI-1640 medium. Spleens were  
24 smashed and passed through sterile mesh filters using 10 ml of medium to  
25 wash the screens. The cells were spun down at 1,200 rpm for 5 min, and the

1 supernatant was removed and then resuspended in 10 ml ACK buffer  
2 (BioLegend) for red blood cell lysis. The cells were briefly vortexed, allowed to  
3 sit at room temperature for 1 min and then quenched with 5 ml of culture  
4 medium. Cells were then spun down and resuspended in culture medium,  
5 counted and plated in six-well plates at  $2 \times 10^6$  cells/ml. CD8<sup>+</sup> T cells from the  
6 OT-I splenocytes obtained above were further isolated with a CD8a<sup>+</sup> T-Cell  
7 Isolation Kit (Miltenyi). Flow-through CD8<sup>+</sup> T cells were collected for future  
8 experiments.

9

#### 10 **PDTF cultures and analysis**

11 The procedure has been delineated in prior work.<sup>8</sup> In brief, tissue samples  
12 designated for PDTF cultures were meticulously processed into 1-2 mm<sup>3</sup>  
13 fragments. These fragments were then embedded in a tailored artificial  
14 extracellular matrix combined with Matrigel, and allocated within a 96-well plate.  
15 After stabilization at 37°C, they received a tumor medium supplemented with  
16 either with EFV or anti-PD-1. After incubation for 48 h, the PDTFs were readied  
17 for flow cytometry. This procedure aimed to evaluate T-cell activation using  
18 designated antibodies, including ICOS, CD137, and CD25. Subsequently, the  
19 PDTFs were isolated, subjected to enzymatic digestion, and transformed into  
20 single-cell suspensions. After a blocking phase, these cells were stained and  
21 analyzed. Moreover, 48 h after culture, supernatants from the PDTF cultures  
22 underwent analysis to determine IFN- $\gamma$  levels, using the Human IFN- $\gamma$  ELISA  
23 Kit (Lianke) following the manufacturer's guidelines.

## 1 **References**

- 2 1 Rooney, M. S., Shukla, S. A., Wu, C. J., Getz, G. & Hacohen, N. Molecular and genetic  
3 properties of tumors associated with local immune cytolytic activity. *Cell* **160**, 48-61 (2015).  
4 <https://doi.org:10.1016/j.cell.2014.12.033>
- 5 2 Salgado, R. *et al.* The evaluation of tumor-infiltrating lymphocytes (TILs) in breast cancer:  
6 recommendations by an International TILs Working Group 2014. *Annals of oncology : official*  
7 *journal of the European Society for Medical Oncology* **26**, 259-271 (2015).  
8 <https://doi.org:10.1093/annonc/mdu450>
- 9 3 Li, N. *et al.* ZMYND8 Reads the Dual Histone Mark H3K4me1-H3K14ac to Antagonize  
10 the Expression of Metastasis-Linked Genes. *Molecular cell* **63**, 470-484 (2016).  
11 <https://doi.org:10.1016/j.molcel.2016.06.035>
- 12 4 Buenrostro, J. D., Giresi, P. G., Zaba, L. C., Chang, H. Y. & Greenleaf, W. J.  
13 Transposition of native chromatin for fast and sensitive epigenomic profiling of open  
14 chromatin, DNA-binding proteins and nucleosome position. *Nat Methods* **10**, 1213-1218  
15 (2013). <https://doi.org:10.1038/nmeth.2688>
- 16 5 Carter, S. L., Eklund, A. C., Kohane, I. S., Harris, L. N. & Szallasi, Z. A signature of  
17 chromosomal instability inferred from gene expression profiles predicts clinical outcome in  
18 multiple human cancers. *Nat Genet* **38**, 1043-1048 (2006).
- 19 6 Cohen-Sharir, Y. *et al.* Aneuploidy renders cancer cells vulnerable to mitotic checkpoint  
20 inhibition. *Nature* **590**, 486-491 (2021). <https://doi.org:10.1038/s41586-020-03114-6>
- 21 7 Wang, S. *et al.* Copy number signature analysis tool and its application in prostate  
22 cancer reveals distinct mutational processes and clinical outcomes. *PLoS Genet* **17**,  
23 e1009557 (2021). <https://doi.org:10.1371/journal.pgen.1009557>
- 24 8 Voabil, P. *et al.* An ex vivo tumor fragment platform to dissect response to PD-1 blockade  
25 in cancer. *Nature medicine* **27**, 1250-1261 (2021). [https://doi.org:10.1038/s41591-021-01398-](https://doi.org:10.1038/s41591-021-01398-3)  
26 [3](https://doi.org:10.1038/s41591-021-01398-3)

27
