# Supplementary material
Source: PubMed Central journal article supplement (PMC10770380)
Supplement: 41422_2023_909_MOESM4_ESM.pdf [file 41422_2023_909_MOESM4_ESM.pdf]

# Supplementary information, Fig. S3

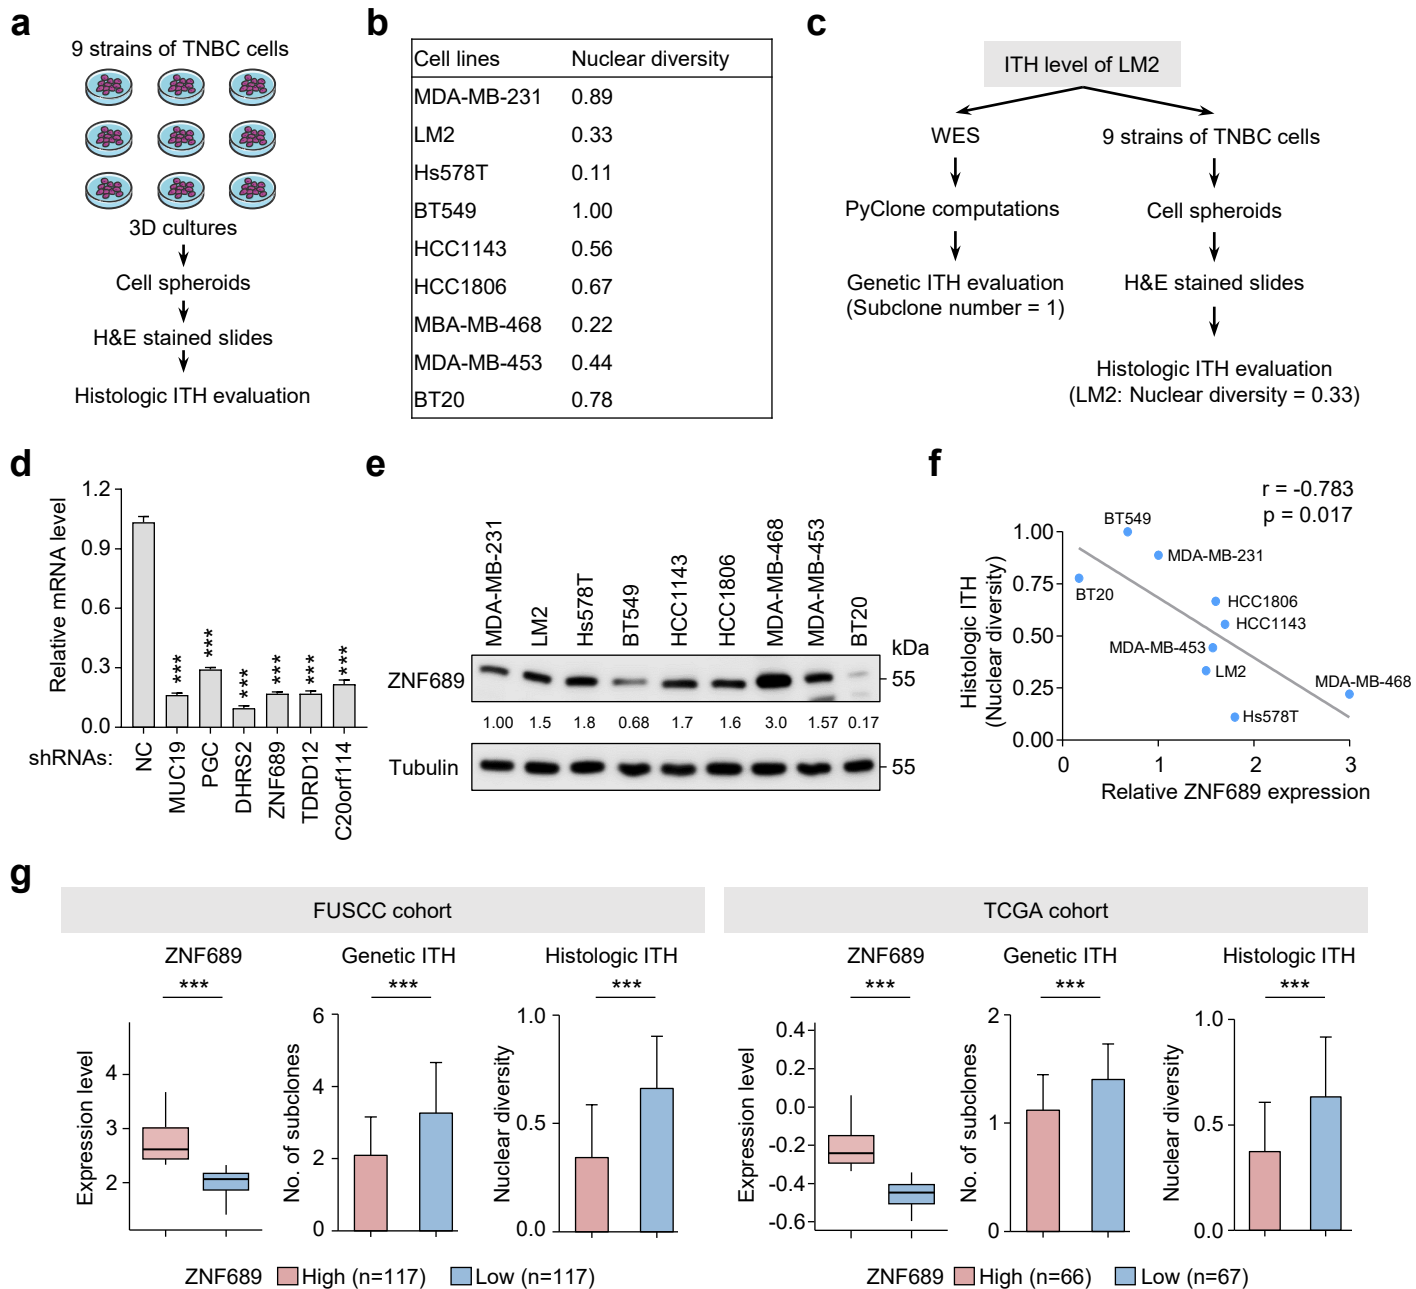

**Supplementary information, Fig. S3 Inverse correlation between ZNF689 expression and ITH in TNBC.**

**a** Scheme illustrating the procedural steps of the 3D tumor sphere assay used to assess the histologic ITH across 9 strains of TNBC cells. **b** Table of histologic ITH assessment results for 9 TNBC cell lines. **c** Assessment method for ITH in LM2 models. **d** RT-qPCR analysis of the relative mRNA levels of MUC19, PGC, DHRS2, ZNF689, TDRD12, and C20orf114 after shRNA knockdown in LM2 cells. **e** Western blot analysis of ZNF689 protein expression levels in 9 TNBC cell lines. **f** Spearman's rank analysis of correlations between levels of ZNF689 expression and histologic ITH in 9 TNBC cell lines. **g** Genetic ITH and histologic ITH levels of tumors in the FUSCC cohort and TCGA cohort with different expression levels of ZNF689. P values were determined using one-way ANOVA (**d**) and permutation tests (**g**). \*\*\*p < 0.001.
