# Supplementary material
Source: PubMed Central journal article supplement (PMC10770380)
Supplement: 41422_2023_909_MOESM6_ESM.pdf [file 41422_2023_909_MOESM6_ESM.pdf]

# Supplementary information, Fig. S5

**a**

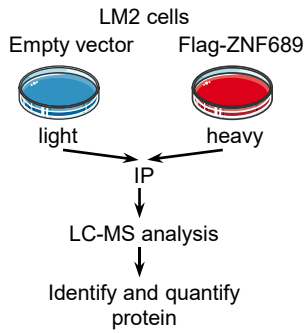

**b**

**Table. The top 8 proteins of accurate quantification and significance.**

| Gene names   | Unique peptides | Log <sub>2</sub> (Ratio H/L) | p        |
|--------------|-----------------|------------------------------|----------|
| ZNF689       | 12              | 4.968                        | 8.09E-08 |
| TRIM28       | 28              | 4.799                        | 2.00E-07 |
| NT5C2        | 10              | 3.798                        | 2.48E-05 |
| CKAP4        | 2               | 2.696                        | 0.0017   |
| RPL10;RPL10L | 4               | 2.434                        | 0.0040   |
| RPS11        | 5               | 2.272                        | 0.0065   |
| RPL19        | 4               | 2.215                        | 0.0077   |
| KPNA3;KPNA4  | 2               | 2.133                        | 0.0098   |

**c**

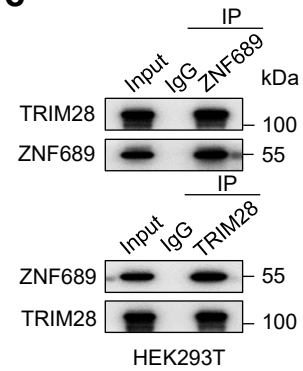

**d**

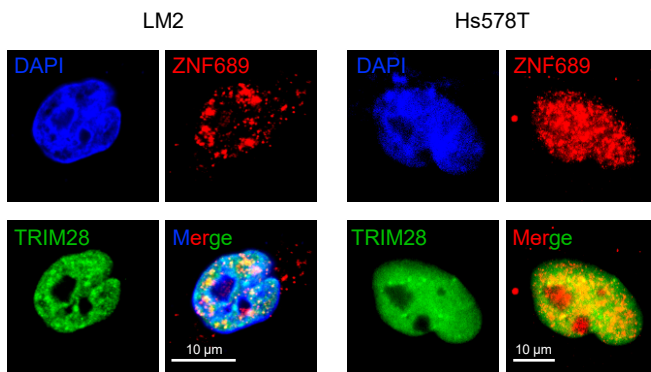

**e**

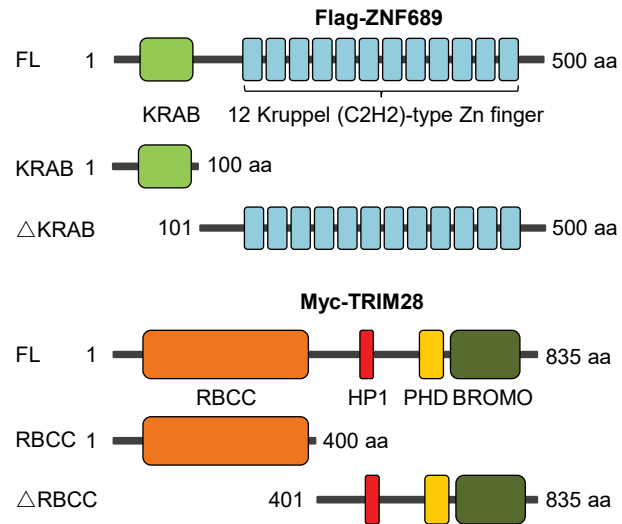

**f**

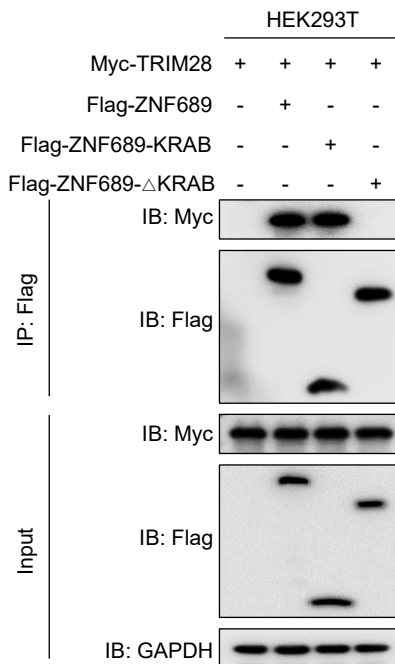

**g**

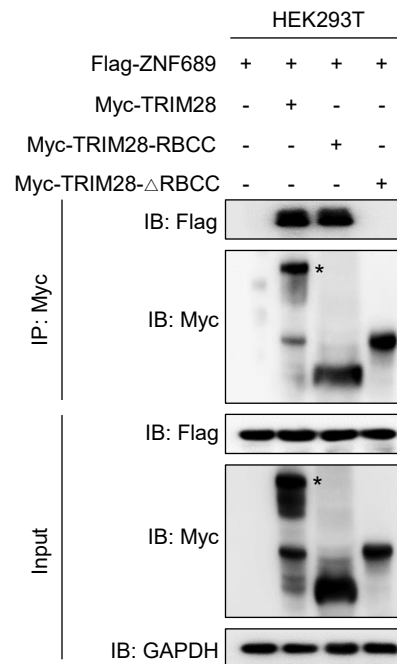

**Supplementary information, Fig. S5 ZNF689 interacts with TRIM28.**

**a** Scheme showing the steps used to identify ZNF689-interacting proteins. **b** The top 8 ZNF689-interacting proteins of accurate quantification and significance. **c** Co-IP experiments of endogenous ZNF689 and TRIM28 followed by western blotting in HEK293T cells. **d** IF staining of ZNF689 and TRIM28 in LM2 and Hs578T cells. Cell nuclei were counterstained with DAPI. Scale bar, 10  $\mu\text{m}$ . **e** Diagrams of Flag-ZNF689 and Myc-TRIM28 and their deletion mutants. **f, g** HEK293T cells were transfected with plasmids encoding Flag-ZNF689 (**f**) and Myc-TRIM28 (**g**) and their deletion mutants. After 48 h of transfection, the cells were harvested for sequential western blotting analysis. Single asterisks represent specific bands.
