# Supplementary material
Source: PubMed Central journal article supplement (PMC10770380)
Supplement: 41422_2023_909_MOESM10_ESM.pdf [file 41422_2023_909_MOESM10_ESM.pdf]

# Supplementary information, Fig. S9

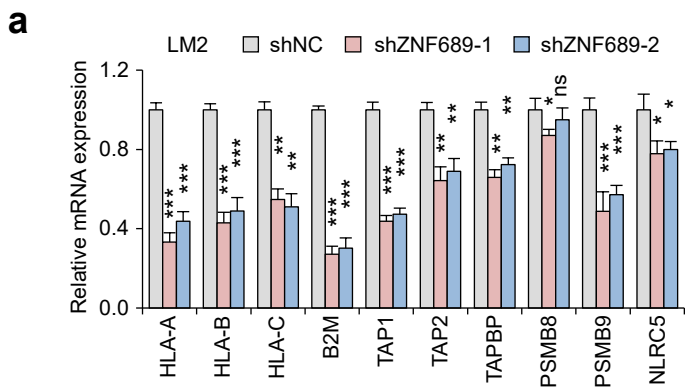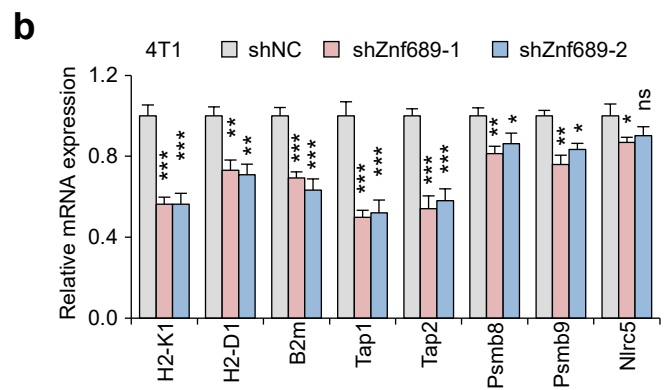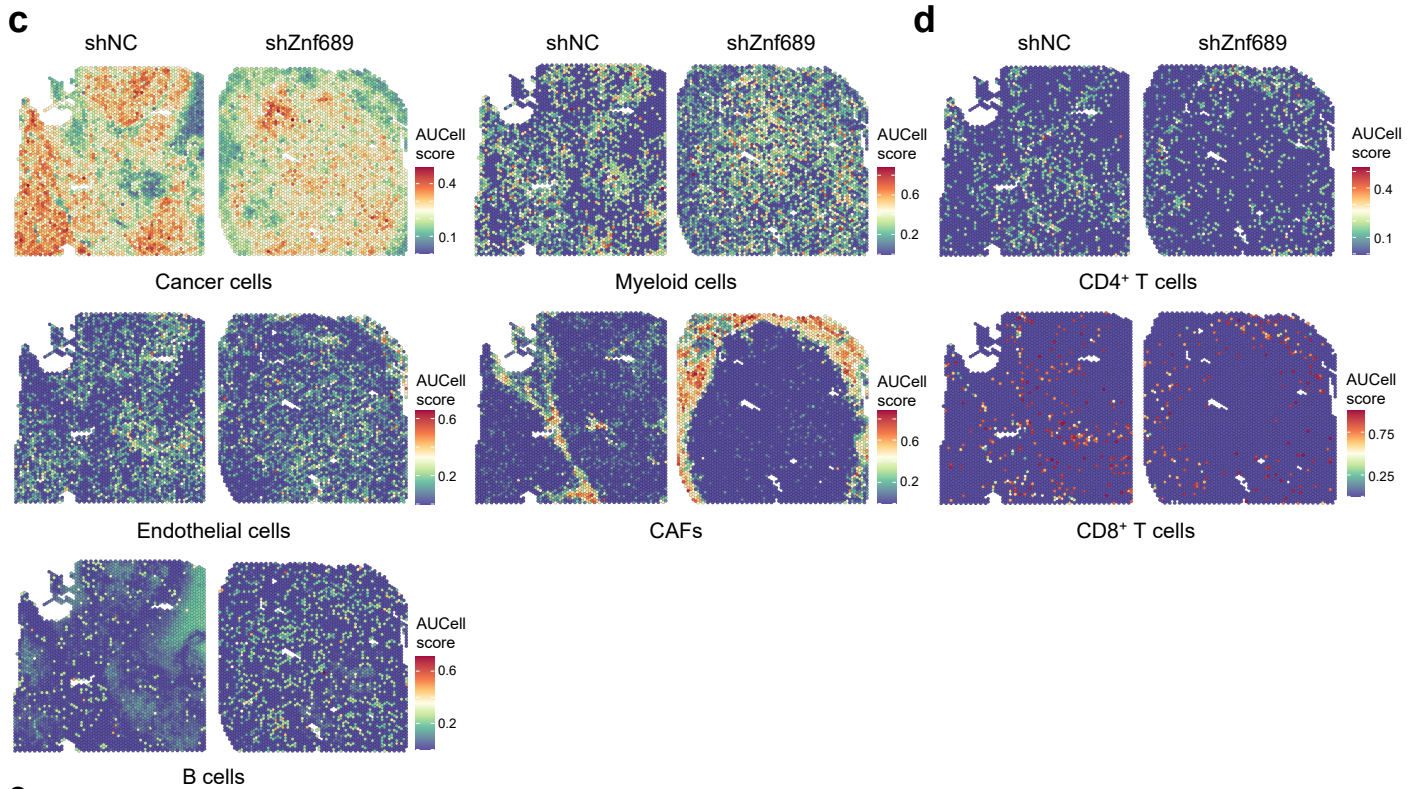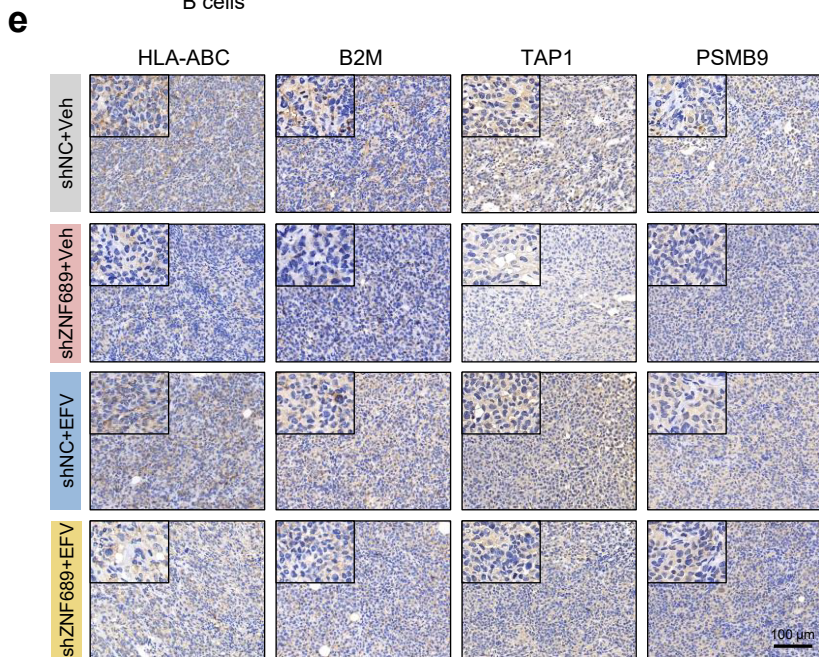

**Supplementary information, Fig. S9 ZNF689 deficiency impairs antigen presentation in TNBC.**

**a, b** RT-qPCR analysis of MHC-I antigen processing and presentation-associated genes in LM2 (**a**) and 4T1 (**b**) cells. **c** Signature scores of cancer cells, myeloid cells, endothelial cells, CAFs and B cells in the spots of shNC and shZnf689 tumors. **d** Signature scores of CD4<sup>+</sup> T cells and CD8<sup>+</sup> T cells in the spots of shNC and shZnf689 tumors. **e** IHC analysis of HLA-ABC, B2M, TAP1, and PSMB9 protein expression with the associated H-score for representative tumors from mice in Fig. 4h. Scale bar, 100  $\mu$ m. P values were determined using one-way ANOVA. ns, not significant; \*p < 0.05, \*\*p < 0.01, \*\*\*p < 0.001.
