# Supplementary material
Source: PubMed Central journal article supplement (PMC10770380)
Supplement: 41422_2023_909_MOESM11_ESM.pdf [file 41422_2023_909_MOESM11_ESM.pdf]

# Supplementary information, Fig. S10

**a**

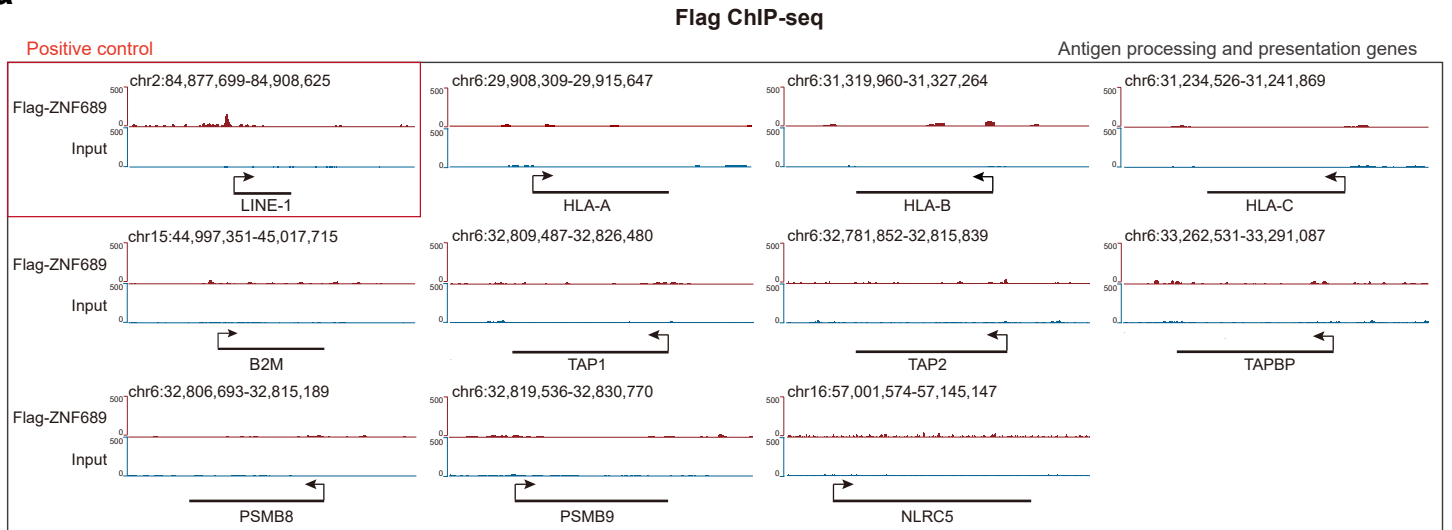

**b**

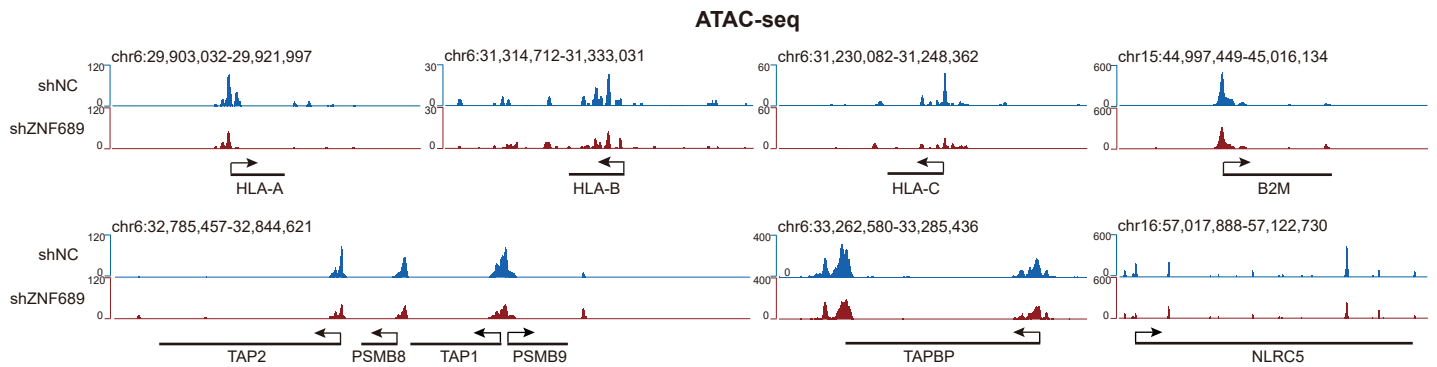

**c**

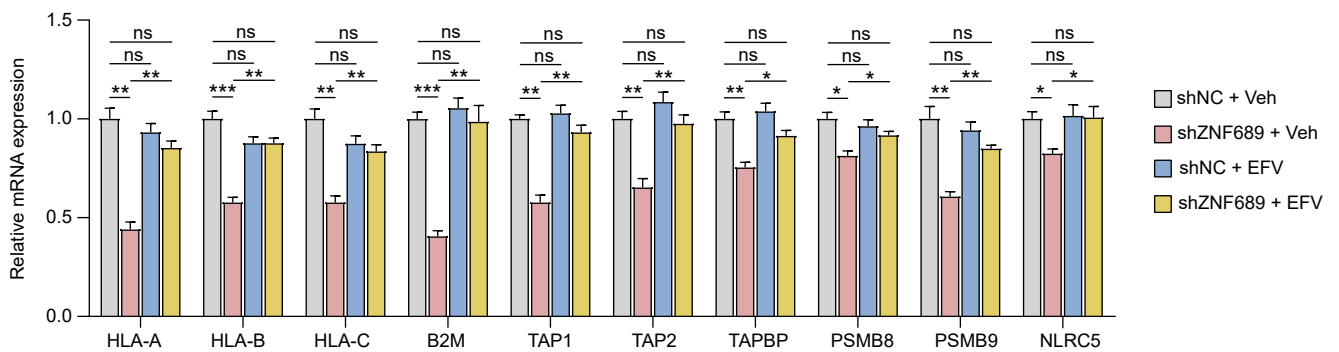

**d**

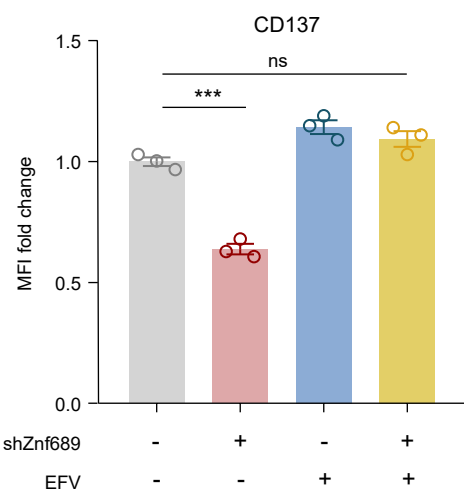

**e**

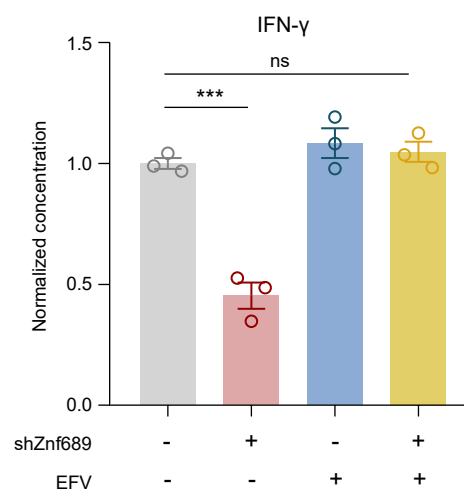

**Supplementary information, Fig. S10 ZNF689 knockdown results in decreased chromatin accessibility of antigen processing and presentation genes.**

**a** ChIP-seq tracks of Flag-ZNF689 at the genomic loci of key antigen processing and presentation genes in LM2 cells. LINE-1 as a positive control.

**b** ATAC-seq tracks of key antigen processing and presentation genes in LM2

cells. **c** RT-qPCR analysis of antigen processing and presentation genes in LM2

cells after EFV treatment. **d, e** OT-I splenocytes cocultured with the indicated tumor cells for 24 h were collected for flow cytometry analysis. The expression

of the activation marker CD137 in CD8<sup>+</sup> T cells was determined (**d**). Culture

medium was collected for ELISA to examine the concentration of IFN- $\gamma$  (**e**). P

values were determined using one-way ANOVA. ns, not significant; \*p < 0.05,

\*\*p < 0.01, \*\*\*p < 0.001.
