# Supplementary material
Source: PubMed Central journal article supplement (PMC10770380)
Supplement: 41422_2023_909_MOESM12_ESM.pdf [file 41422_2023_909_MOESM12_ESM.pdf]

## Supplementary information, Fig. S11

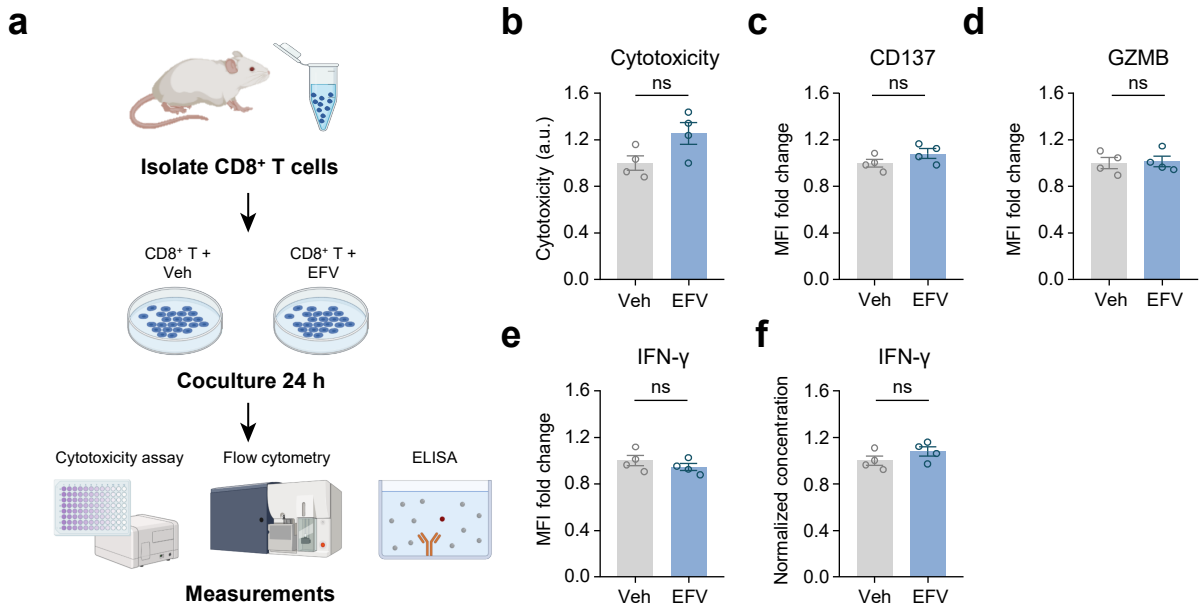

**Supplementary information, Fig. S11 The LINE-1 inhibitor EFV had no direct effect on CD8<sup>+</sup> T cells.**

**a** Schematic diagram of the *in vitro* CD8<sup>+</sup> T-cell-EFV coculture assay. Briefly, peripheral blood was drawn from BALB/c mice and CD8<sup>+</sup> T cells were subsequently isolated. The CD8<sup>+</sup> T cells were then cultured with EFV (20 μM) for 24 h. Following this incubation, we evaluated the CD8<sup>+</sup> T-cell cytotoxic activities and their activation status. **b** Cytotoxicity analysis of culture medium at 24 h after EFV and CD8<sup>+</sup> T-cell coculture. **c-e** Flow cytometry analysis was used to determine the expression of CD137 (**c**), GZMB (**d**) and IFN-γ (**e**) in CD8<sup>+</sup> T cells. **f** Culture medium was collected for ELISA to examine the concentration of IFN-γ. P values were determined using two-tailed unpaired Student's t tests. ns, not significant.
