# Supplementary material
Source: PubMed Central journal article supplement (PMC10770380)
Supplement: 41422_2023_909_MOESM13_ESM.pdf [file 41422_2023_909_MOESM13_ESM.pdf]

# Supplementary information, Fig. S12

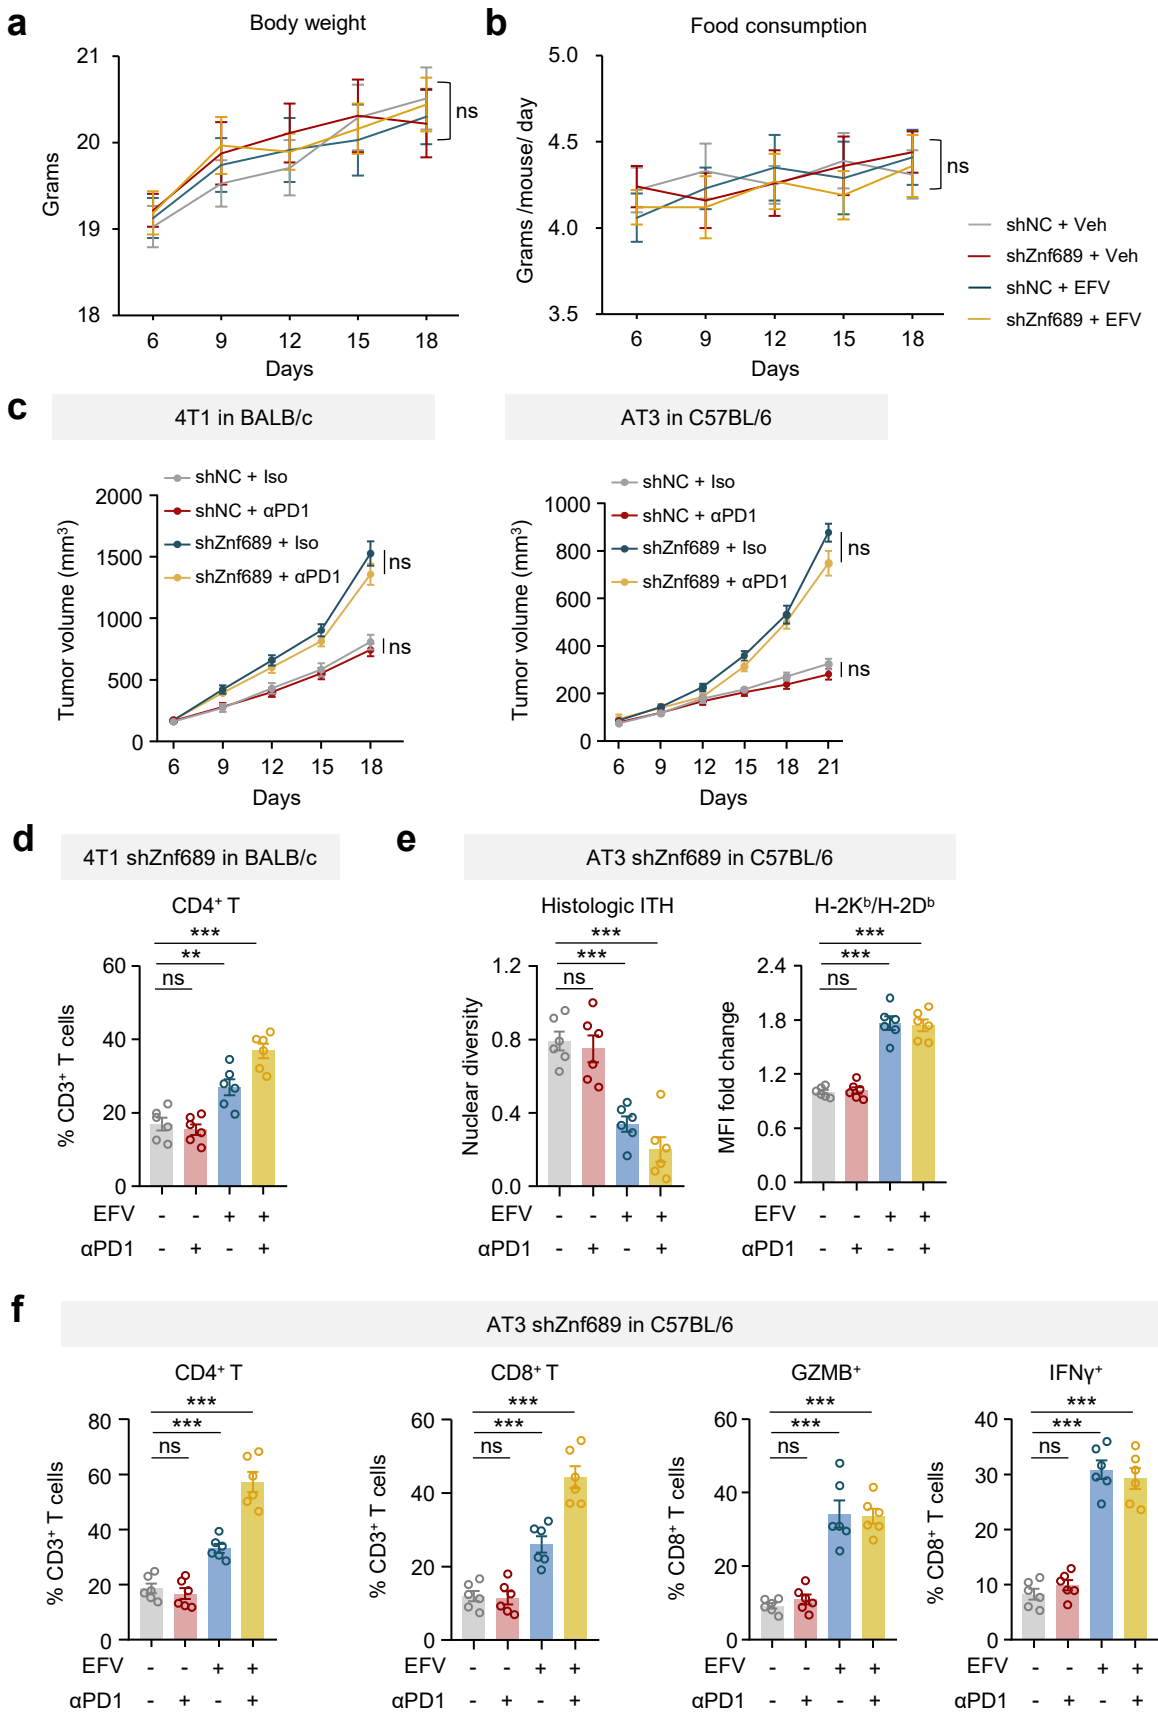

**Supplementary information, Fig. S12 LINE-1 inhibition reprograms the tumor microenvironment and sensitizes anti-PD-1 therapy *in vivo*.**

**a, b** Daily average body weight (**a**) and food consumption (**b**) were monitored in BALB/c mice injected with 4T1 cells (shNC or shZnf689) and treated with EFV post-tumor emergence (n = 6 mice/group). **c** Growth curves of 4T1 and AT3 mammary tumors in mice subjected to treatment regimens with or without anti-PD-1 (n = 5 mice/group). **d** The 4T1 tumors from mice in Fig. 6e were harvested for flow cytometry to determine the percentages of CD4<sup>+</sup> T cells among CD3<sup>+</sup> T cells (n = 6). **e** The histologic ITH and MHC-I levels on the surface of AT3 tumors from mice in Fig. 6j (n = 6). MFI, mean fluorescence intensity. **f** The AT3 tumors from mice in Fig. 6j were harvested for flow cytometry to determine the percentages of CD4<sup>+</sup> T cells among CD3<sup>+</sup> T cells, CD8<sup>+</sup> T cells among CD3<sup>+</sup> T cells, GZMB<sup>+</sup> cells among CD8<sup>+</sup> T cells, and IFN- $\gamma$ <sup>+</sup> cells among CD8<sup>+</sup> T cells (n = 6). P values were determined using two-way ANOVA (**a-c**) and one-way ANOVA (**d-f**). ns, not significant; \*\*p < 0.01, \*\*\*p < 0.001.
