# Supplementary material
Source: PubMed Central journal article supplement (PMC10770380)
Supplement: 41422_2023_909_MOESM14_ESM.pdf [file 41422_2023_909_MOESM14_ESM.pdf]

# Supplementary information, Fig. S13

**a**

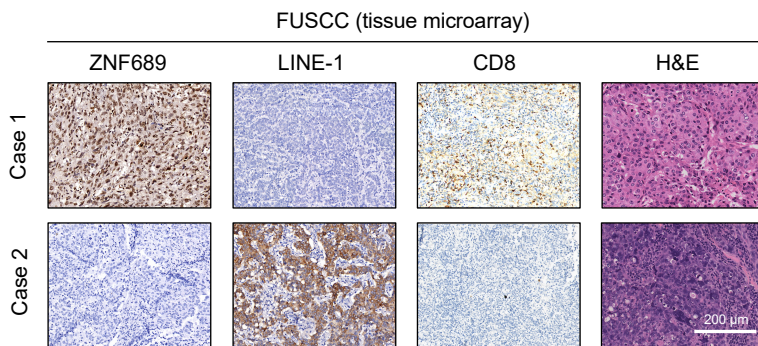

**b**

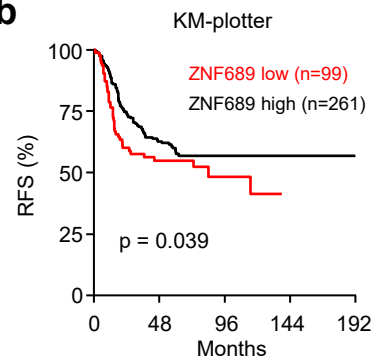

**c**

|          |      | LINE-1 |     | HLA-ABC |     | CD8   |     |
|----------|------|--------|-----|---------|-----|-------|-----|
|          |      | High   | Low | High    | Low | High  | Low |
| ZNF689   | High | 14     | 42  | 35      | 21  | 38    | 18  |
|          | Low  | 27     | 17  | 16      | 28  | 20    | 24  |
| <i>P</i> |      | <0.001 |     | 0.017   |     | 0.040 |     |

## Supplementary information, Fig. S13 Clinical validation of ZNF689 expression.

**a** Representative images of IHC staining of ZNF689, LINE-1 ORF1p, and CD8 and H&E staining in primary tumors from TNBC patients. Scale bar, 200  $\mu$ m. **b** Kaplan-Meier analysis of the RFS of patients with basal-like breast cancer from KM-Plotter grouped according to the expression of ZNF689. **c** Analysis of the association between ZNF689 and LINE-1 ORF1p, HLA-ABC and CD8 expression levels in patients treated with anti-PD-1 therapy. *P* values were determined using the log-rank test (**b**) and Pearson's chi-square test (**c**).
