# Supplementary material
Source: PubMed Central journal article supplement (PMC10770380)
Supplement: 41422_2023_909_MOESM15_ESM.pdf [file 41422_2023_909_MOESM15_ESM.pdf]

# Supplementary information, Fig. S14

**a**

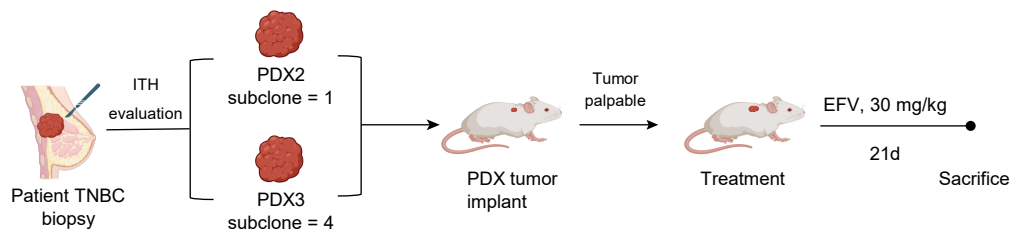

**b**

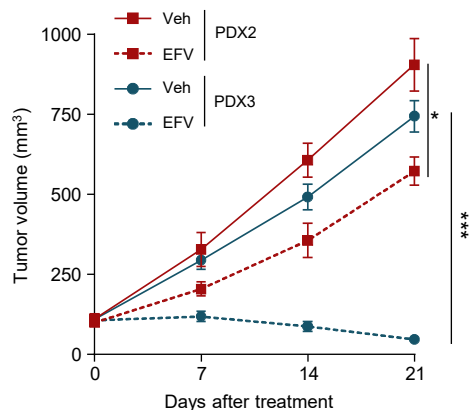

**c**

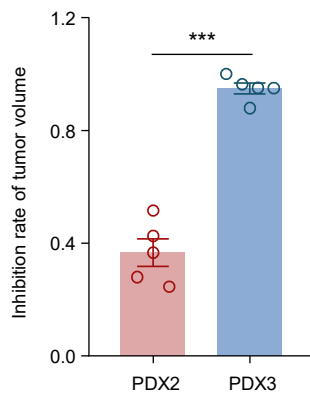

**d**

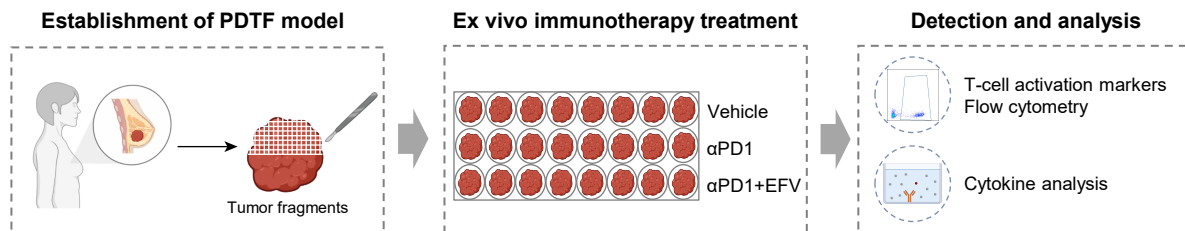

**e**

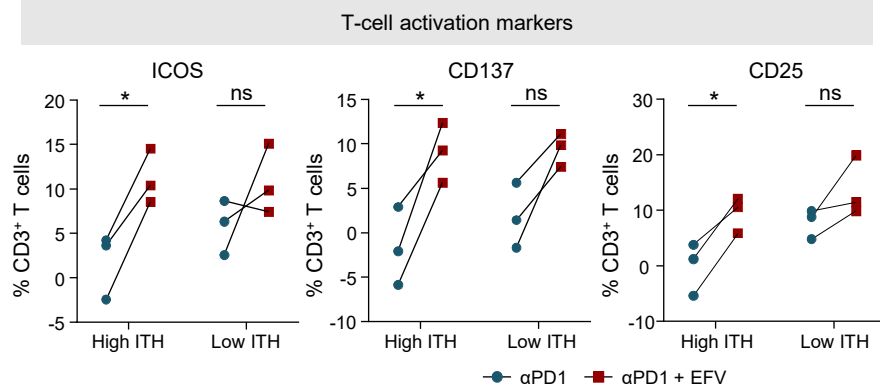

**f**

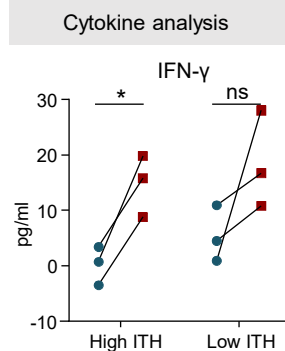

**Supplementary information, Fig. S14 The LINE-1 inhibitor EFV sensitizes tumors with diverse subclones and enhances anti-PD-1 treatment efficacy in TNBC.**

**a** Schematic representation showcasing the influence of EFV on PDX models with different subclones. **b** Growth curves of various PDXs treated with or without EFV in NSG mice (n = 5 mice/group). **c** Rate of tumor volume inhibition across different PDXs (n = 5). **d** Flow chart of the PDTF collection, culture and analysis strategy. **e** Delta values of the T-cell activation markers ICOS, CD137 and CD25 between the treated and untreated conditions in tumors with the high ITH (n = 3) and low ITH (n = 3). **f** Delta values of the cytotoxic marker IFN- $\gamma$  between the treated and untreated conditions in tumors with high ITH (n = 3) and low ITH (n = 3). P values were determined using two-way ANOVA (**b**), two-tailed unpaired (**c**) and paired (**e**, **f**) Student's t tests. ns, not significant; \*p < 0.05; \*\*\*p < 0.001.
