# Supplementary material
Source: PubMed Central journal article supplement (PMC10770380)
Supplement: 41422_2023_909_MOESM16_ESM.pdf [file 41422_2023_909_MOESM16_ESM.pdf]

# Supplementary information, Fig. S15

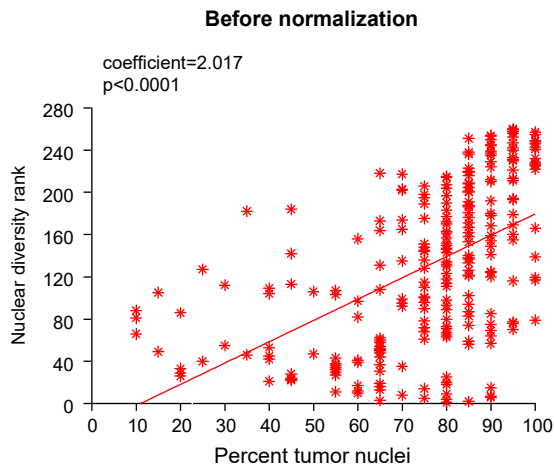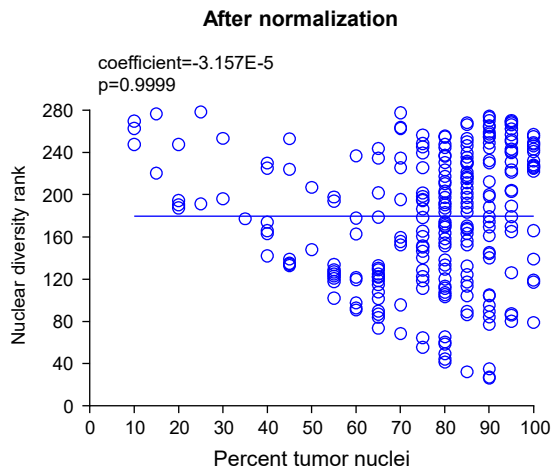

**Supplementary information, Fig. S15 Normalization of histologic ITH through linear regression analysis to account for differences in tumor purity.**
