# Supplementary material
Source: PubMed Central journal article supplement (PMC10770380)
Supplement: 41422_2023_909_MOESM17_ESM.pdf [file 41422_2023_909_MOESM17_ESM.pdf]

**Supplementary information, Table S1. Characteristics of TNBC patients in the FUSCC cohort.**

| Characteristic     | Overall<br>(n, %) | High genetic ITH<br>(n, %) | Low genetic ITH<br>(n, %) | p            | High histologic ITH<br>(n, %) | Low histologic ITH<br>(n, %) | p            |
|--------------------|-------------------|----------------------------|---------------------------|--------------|-------------------------------|------------------------------|--------------|
| <b>Total</b>       | 260 (100.0)       | 115 (44.2)                 | 145 (55.8)                |              | 130 (50.0)                    | 130 (50.0)                   |              |
| <b>Age (years)</b> |                   |                            |                           | <b>0.856</b> |                               |                              | <b>1.000</b> |
| ≤40                | 27 (10.4)         | 11 (9.6)                   | 16 (11.0)                 |              | 13 (10.0)                     | 14 (10.8)                    |              |
| >40                | 233 (89.6)        | 104 (90.4)                 | 129 (89.0)                |              | 117 (90.0)                    | 116 (89.2)                   |              |
| <b>Menopause</b>   |                   |                            |                           | <b>0.438</b> |                               |                              | <b>0.525</b> |
| Yes                | 160 (61.5)        | 76 (66.1)                  | 84 (57.9)                 |              | 76 (58.5)                     | 84 (64.6)                    |              |
| No                 | 97 (37.3)         | 38 (33.0)                  | 59 (40.7)                 |              | 52 (40.0)                     | 45 (34.6)                    |              |
| Unknown            | 3 (1.2)           | 1 (0.9)                    | 2 (1.4)                   |              | 2 (1.5)                       | 1 (0.8)                      |              |
| <b>Grade</b>       |                   |                            |                           | <b>0.072</b> |                               |                              | <b>0.155</b> |
| 2                  | 45 (17.3)         | 20 (17.4)                  | 25 (17.2)                 |              | 17 (13.1)                     | 28 (21.5)                    |              |
| 3                  | 187 (71.9)        | 77 (67.0)                  | 110 (75.9)                |              | 100 (76.9)                    | 87 (66.9)                    |              |
| Unknown            | 28 (10.8)         | 18 (15.6)                  | 10 (6.9)                  |              | 13 (10.0)                     | 15 (11.6)                    |              |
| <b>Tumor size</b>  |                   |                            |                           | <b>0.833</b> |                               |                              | <b>0.364</b> |
| ≤2cm               | 92 (35.4)         | 42 (36.5)                  | 50 (34.5)                 |              | 50 (38.5)                     | 42 (32.3)                    |              |
| >2cm               | 168 (64.6)        | 73 (63.5)                  | 95 (65.5)                 |              | 80 (61.5)                     | 88 (67.7)                    |              |

|                          |            |            |            |              |            |              |
|--------------------------|------------|------------|------------|--------------|------------|--------------|
| <b>Lymph node status</b> |            |            |            | <b>0.372</b> |            | <b>0.899</b> |
| Negative                 | 156 (60.0) | 73 (63.5)  | 83 (57.2)  |              | 77 (59.2)  | 79 (60.8)    |
| Positive                 | 104 (40.0) | 42 (36.5)  | 62 (42.8)  |              | 53 (40.8)  | 51 (39.2)    |
| <b>Ki-67</b>             |            |            |            | <b>0.161</b> |            | <b>0.105</b> |
| ≤20%                     | 36 (13.8)  | 21 (18.3)  | 15 (10.3)  |              | 21 (16.2)  | 15 (11.5)    |
| >20%                     | 221 (85.0) | 93 (80.9)  | 128 (88.3) |              | 106 (81.5) | 115 (88.5)   |
| Unknown                  | 3 (1.2)    | 1 (0.8)    | 2 (1.4)    |              | 3 (2.3)    | 0 (0.0)      |
| <b>Histology</b>         |            |            |            | <b>0.214</b> |            | <b>0.245</b> |
| IDC                      | 240 (92.3) | 103 (89.6) | 137 (94.5) |              | 117 (90.0) | 123 (94.6)   |
| Others                   | 20 (7.7)   | 12 (10.4)  | 8 (5.5)    |              | 13 (10.0)  | 7 (5.4)      |
| <b>OS status</b>         |            |            |            |              |            |              |
| Alive                    | 223 (85.8) | 93 (80.9)  | 130 (89.7) |              | 109 (83.8) | 114 (87.7)   |
| Deceased                 | 37 (14.2)  | 22 (19.1)  | 15 (10.3)  |              | 21 (16.2)  | 16 (12.3)    |
| <b>RFS status</b>        |            |            |            |              |            |              |
| non-Relapsed             | 208 (80.0) | 84 (73.0)  | 124 (85.5) |              | 99 (76.2)  | 109 (83.8)   |
| Relapsed                 | 52 (20.0)  | 31 (27.0)  | 21 (14.5)  |              | 31 (23.8)  | 21 (16.2)    |
| <b>DMFS status</b>       |            |            |            |              |            |              |
| non-Metastatic           | 212 (81.5) | 86 (74.8)  | 126 (86.9) |              | 102 (78.5) | 110 (84.6)   |

| Metastatic               | 48 (18.5)            | 29 (25.2)           | 19 (13.1)            | 28 (21.5)            | 20 (15.4)           |
|--------------------------|----------------------|---------------------|----------------------|----------------------|---------------------|
| <b>Survival (months)</b> |                      |                     |                      |                      |                     |
| Median follow-up         | 86.47 (71.07-100.39) | 83.20 (65.42-96.85) | 88.10 (73.80-101.23) | 84.97 (71.10-102.08) | 87.23 (70.67-99.68) |
| Median OS                | 84.98 (66.25-98.95)  | 81.71 (61.85-95.46) | 86.83 (71.23-99.55)  | 83.33 (65.92-100.62) | 85.98 (66.60-98.25) |
| Median RFS               | 84.04 (55.97-97.13)  | 78.42 (46.70-93.88) | 85.98 (62.82-99.19)  | 81.76 (55.87-98.50)  | 85.40 (60.84-97.06) |
| Median DMFS              | 84.40 (60.71-98.95)  | 79.38 (46.70-94.09) | 86.83 (69.03-100.34) | 82.15 (59.89-100.62) | 85.80 (61.53-98.25) |

Abbreviations: IDC, invasive ductal carcinoma; OS, overall survival; RFS, recurrence-free survival; DMFS, distant metastasis-free survival.
