# Supplementary material
Source: PubMed Central journal article supplement (PMC10770380)
Supplement: 41422_2023_909_MOESM18_ESM.pdf [file 41422_2023_909_MOESM18_ESM.pdf]

**Supplementary information, Table S2. Characteristics of TNBC patients in the TCGA cohort.**

| Characteristics          | Overall<br>(n, %) | High genetic ITH<br>(n, %) | Low genetic ITH<br>(n, %) | p            | High histologic ITH<br>(n, %) | Low histologic ITH<br>(n, %) | p            |
|--------------------------|-------------------|----------------------------|---------------------------|--------------|-------------------------------|------------------------------|--------------|
| <b>Total</b>             | 134 (100.0)       | 31 (23.1)                  | 103 (76.9)                |              | 67 (50.0)                     | 67 (50.0)                    |              |
| <b>Age (years)</b>       |                   |                            |                           | <b>0.224</b> |                               |                              | <b>1.000</b> |
| ≤40                      | 17 (12.7)         | 6 (19.4)                   | 11 (10.7)                 |              | 9 (13.4)                      | 8 (11.9)                     |              |
| >40                      | 117 (87.3)        | 25 (80.6)                  | 92 (89.3)                 |              | 58 (86.6)                     | 59 (88.1)                    |              |
| <b>Menopause</b>         |                   |                            |                           | <b>0.474</b> |                               |                              | <b>0.236</b> |
| Yes                      | 81 (60.5)         | 16 (51.6)                  | 65 (63.1)                 |              | 38 (56.7)                     | 43 (64.2)                    |              |
| No                       | 44 (32.8)         | 13 (41.9)                  | 31 (30.1)                 |              | 22 (32.8)                     | 22 (32.8)                    |              |
| Unknown                  | 9 (6.7)           | 2 (6.5)                    | 7 (6.8)                   |              | 7 (10.5)                      | 2 (3.0)                      |              |
| <b>Tumor size</b>        |                   |                            |                           | <b>0.949</b> |                               |                              | <b>0.688</b> |
| ≤2cm                     | 33 (24.6)         | 7 (22.6)                   | 26 (25.2)                 |              | 18 (26.9)                     | 15 (22.4)                    |              |
| >2cm                     | 101 (75.4)        | 24 (77.4)                  | 77 (74.8)                 |              | 49 (73.1)                     | 52 (77.6)                    |              |
| <b>Lymph node status</b> |                   |                            |                           | <b>0.263</b> |                               |                              | <b>0.459</b> |
| Negative                 | 91 (67.9)         | 18 (58.1)                  | 73 (70.9)                 |              | 48 (71.6)                     | 43 (64.2)                    |              |
| Positive                 | 43 (32.1)         | 13 (41.9)                  | 30 (29.1)                 |              | 19 (28.4)                     | 24 (35.8)                    |              |
| <b>Histology</b>         |                   |                            |                           | <b>0.771</b> |                               |                              | <b>0.620</b> |
| IDC                      | 115 (85.8)        | 26 (83.9)                  | 89 (86.4)                 |              | 56 (83.6)                     | 59 (88.1)                    |              |
| Others                   | 19 (14.2)         | 5 (16.1)                   | 14 (13.6)                 |              | 11 (16.4)                     | 8 (11.9)                     |              |

Abbreviations: IDC, invasive ductal carcinoma.
