# Supplementary material
Source: PubMed Central journal article supplement (PMC10770380)
Supplement: 41422_2023_909_MOESM19_ESM.pdf [file 41422_2023_909_MOESM19_ESM.pdf]

**Supplementary information, Table S3. shRNA target sequences.**

| <b>Name</b> | <b>Species</b> | <b>Sequences</b>      |
|-------------|----------------|-----------------------|
| shZNF689-1  | Human          | CGACCTTTGCTCCAAGCGTTT |
| shZNF689-2  | Human          | GCTCTTGACACCCGGAGAGAA |
| shZnf689-1  | Mouse          | TGGTAGCCCTAGACCTCTTAT |
| shZnf689-2  | Mouse          | GAAGGACGTATTCCCACCTAA |
| shMUC19     | Human          | GGTAGTTCATCCTCTGGTGAC |
| shPGC       | Human          | CCTGGTACCAACTTCGTCTAT |
| shDHRS2     | Human          | TGCTAGGCTTTCTGTGAGGAT |
| shTDRD12    | Human          | GCCGAGACAGTACTGACATTG |
| shC20orf114 | Human          | GCAGGTCATGAACCTCCTAGT |
