# Supplementary material
Source: PubMed Central journal article supplement (PMC10770380)
Supplement: 41422_2023_909_MOESM20_ESM.pdf [file 41422_2023_909_MOESM20_ESM.pdf]

**Supplementary information, Table S4. siRNA target sequences.**

| <b>Name</b> | <b>Sequences</b>      |
|-------------|-----------------------|
| siZNF689    | CCCAAAGTGTAGCCCTAGA   |
| siNC        | TTCTCCGAACGTGTCACGTTT |
