# Supplementary material
Source: PubMed Central journal article supplement (PMC10770380)
Supplement: 41422_2023_909_MOESM21_ESM.pdf [file 41422_2023_909_MOESM21_ESM.pdf]

**Supplementary information, Table S5. RT-qPCR primers used in this study.**

| <b>Name</b> | <b>Species</b> | <b>Primers</b> | <b>Sequences</b>         |
|-------------|----------------|----------------|--------------------------|
| ZNF689      | Human          | Forward        | CGAAACACCGATGACTGGGAAC   |
|             |                | Reverse        | TGCCTCCTTAGGCGGGAATACT   |
| MUC19       | Human          | Forward        | TATCTACCTGGAGCAAAGGAGC   |
|             |                | Reverse        | CCTTCCACCTTACATCTTCCAG   |
| PGC         | Human          | Forward        | ACCTACTCCACCAATGGGCAGA   |
|             |                | Reverse        | TCACTCAAGCCGAACTCCTGGT   |
| DHRS2       | Human          | Forward        | GGTGCTGTCATCCTGGTCTCTT   |
|             |                | Reverse        | CCAGCTCCAATGCCAGTGTCT    |
| TDRD12      | Human          | Forward        | TGTCAGCAGACCTGAAGAAGGC   |
|             |                | Reverse        | AGGAGGTAGAGCAAAGGGTTGC   |
| C20orf114   | Human          | Forward        | CATGAACCTCCTAGTGCCATCC   |
|             |                | Reverse        | CAAACCTCCAGACGGTCAATGCTG |
| LINE-1 ORF2 | Human          | Forward        | TGGAGGCATCACACTACCTG     |
|             |                | Reverse        | ATGCGGCATTATTTCTGAGG     |
| HLA-A       | Human          | Forward        | GGCCCTGACCCAGACCTG       |
|             |                | Reverse        | GCACGAACTGCGTGTCGTC      |
| HLA-B       | Human          | Forward        | CATCGTGGGCATTGTTGCTG     |
|             |                | Reverse        | ACGCAGCCTGAGAGTAGC       |
| HLA-C       | Human          | Forward        | CTGGCCCTGACCGAGACCTG     |
|             |                | Reverse        | CGCTTGTACTTCTGTGTCTCC    |
| B2M         | Human          | Forward        | TGACTTTGTCACAGCCCAAG     |
|             |                | Reverse        | AGCAAGCAAGCAGAATTTGG     |
| TAP1        | Human          | Forward        | CCTGTGGCACAAACTCGGG      |
|             |                | Reverse        | ATCTCCCAAGAGAGGAGAGGA    |
| TAP2        | Human          | Forward        | TCGACTCACCTCCTTTCTC      |
|             |                | Reverse        | ACTGCATCCTGGATCTCCC      |
| TAPBP       | Human          | Forward        | CAGCAGGAGCCTGTTCTCAT     |
|             |                | Reverse        | AAGCTCAAGTCCAGCAGAGC     |
| PSMB8       | Human          | Forward        | TCTCCAGAGCTCGCTTTACC     |
|             |                | Reverse        | CACTCCATGCTGGAACCTGA     |
| PSMB9       | Human          | Forward        | CGTTGTGATGGGTTCTGATTCC   |
|             |                | Reverse        | GACAGCTTGTCAAACACTCGGTT  |
| NLRC5       | Human          | Forward        | CACTTGGAGGAGCTGGACTT     |
|             |                | Reverse        | GTGAGTAAGCAAGGCCAAGG     |
| GAPDH       | Human          | Forward        | TCGGAGTCAACGGATTTGGT     |
|             |                | Reverse        | TTGCCATGGGTGGAATCATA     |
| LINE-1 ORF2 | Mouse          | Forward        | TGGCTTGTGCTGTAAGATCGA    |
|             |                | Reverse        | TTCCCAGTCTGTTGGTGGTCT    |
| H2-K1       | Mouse          | Forward        | GCTGGTGAAGCAGAGAGACTCAG  |
|             |                | Reverse        | GGTGACTTTATCTTCAGGTCTGCT |
| H2-D1       | Mouse          | Forward        | AGTGGTGCTGCAGAGCATTACAA  |

|       |       |         |                                       |
|-------|-------|---------|---------------------------------------|
|       |       | Reverse | GGTGA <del>CTT</del> CACCTTTAGATCTGGG |
| B2m   | Mouse | Forward | TGGTGCTTGTCTCACTGACC                  |
|       |       | Reverse | TTCAGTATGTTCCGGCTTCCC                 |
| Tap1  | Mouse | Forward | AGTCTGGAGCCCACGATTTTCATC              |
|       |       | Reverse | GGGTGATAAGAAGAACCGTCCG                |
| Tap2  | Mouse | Forward | TGCCTGTTCTCTGTTGGGAG                  |
|       |       | Reverse | AGCTCCCCTGTCTTGGTCTC                  |
| Psmb8 | Mouse | Forward | TTGGCCAAGGAGTGCAGGTTGTAT              |
|       |       | Reverse | GTCCCGAGAGCCGAGTCCCAT                 |
| Psmb9 | Mouse | Forward | ACCGTGAGGACTTGTTAGCG                  |
|       |       | Reverse | GTAAGGGCTGTCTCGAATTAGCA               |
| Nlrc5 | Mouse | Forward | GCAGCTATGAGCCCTCCAAC                  |
|       |       | Reverse | CTGCTTAGAGAATTCATCTCTTGGG             |
| Gapdh | Mouse | Forward | TGGCAAAGTGGAGATTGTTGCC                |
|       |       | Reverse | AAGATGGTGATGGGCTTCCCG                 |

---
