# Supplementary material
Source: PubMed Central journal article supplement (PMC10770380)
Supplement: 41422_2023_909_MOESM22_ESM.pdf [file 41422_2023_909_MOESM22_ESM.pdf]

**Supplementary information, Table S6. DNA qPCR primers used in this study.**

| <b>Name</b>   | <b>Species</b> | <b>Primers</b> | <b>Sequences</b>         |
|---------------|----------------|----------------|--------------------------|
| LINE-1 5'-UTR | Human          | Forward        | ACAGCTTTGAAGAGAGCAGTGGTT |
|               |                | Reverse        | AGTCTGCCCGTTCTCAGATCT    |
| 5S            | Human          | Forward        | CTCGTCTGATCTCGGAAGCTAAG  |
|               |                | Reverse        | GCGGTCTCCCATCCAAGTAC     |
| LINE-1 ORF2   | Mouse          | Forward        | CTGGCGAGGATGTGGAGAA      |
|               |                | Reverse        | CCTGCAATCCCACCAACAT      |
| 5S            | Mouse          | Forward        | ACGGCCATACCACCCTGAA      |
|               |                | Reverse        | GGTCTCCCATCCAAGTACTAACC  |
