# Supplementary material
Source: PubMed Central journal article supplement (PMC10770380)
Supplement: 41422_2023_909_MOESM23_ESM.pdf [file 41422_2023_909_MOESM23_ESM.pdf]

**Supplementary information, Table S7. Information for antibodies used in this study.**

| <b>Antibodies</b>                           | <b>Source</b>             | <b>Identifier</b>                 |
|---------------------------------------------|---------------------------|-----------------------------------|
| Rabbit anti-human/mouse ZNF689              | Proteintech               | Cat# 25573-1-AP; RRID: AB_2880134 |
| Rabbit anti-human ZNF689                    | GeneTex                   | Cat# GTX122872; RRID: AB_11170718 |
| Rabbit anti-human TRIM28                    | Proteintech               | Cat# 15202-1-AP; RRID: AB_2209890 |
| Rabbit anti-human TRIM28                    | Abcam                     | Cat# ab10483; RRID: AB_297222     |
| Rabbit anti-human LINE-1 ORF1p              | Abcam                     | Cat# ab245249; RRID: AB_2941773   |
| Chicken anti-human LINE-1 ORF2p             | Abcam                     | Cat# ab106004; RRID: AB_10904169  |
| Rabbit anti-mouse LINE-1 ORF1p              | Abcam                     | Cat# ab216324; RRID: AB_2921327   |
| Rabbit anti-mouse LINE-1 ORF2p              | Rockland                  | Cat# 600-401-GT3; RRID: N/A       |
| Rabbit anti-human SETDB1                    | Proteintech               | Cat# 11231-1-AP; RRID: AB_2186069 |
| Rabbit anti-human DNMT3A                    | ABclonal                  | Cat# A2065; RRID: AB_2764088      |
| Rabbit anti-human HP1 $\alpha$              | ABclonal                  | Cat# A12592; RRID: AB_2759434     |
| Rabbit anti-human HP1 $\gamma$              | ABclonal                  | Cat# A2248; RRID: AB_2862981      |
| Rabbit anti-human SUV39H1                   | Proteintech               | Cat# 10574-1-AP; RRID: AB_2196710 |
| Rabbit anti-human H3K9me3                   | Abcam                     | Cat# ab8898; RRID: AB_306848      |
| Mouse anti-human CD8 $\alpha$               | Cell Signaling Technology | Cat# 70306S; RRID: AB_2799781     |
| Rabbit anti-human HLA class I ABC           | Proteintech               | Cat# 15240-1-AP; RRID: AB_1557426 |
| Rabbit anti-human B2M                       | Proteintech               | Cat# 13511-1-AP; RRID: AB_2062735 |
| Rabbit anti-human TAP1                      | Proteintech               | Cat# 11114-1-AP; RRID: AB_2200201 |
| Rabbit anti-human PSMB9                     | Proteintech               | Cat# 14544-1-AP; RRID: AB_2268925 |
| Rabbit anti-human/mouse p-Histone H2A.XS139 | Abcam                     | Cat# ab22551; RRID: AB_447150     |
| Rabbit anti-human H2AX                      | Cell Signaling Technology | Cat# 7631; RRID: AB_10860771      |
| Rabbit anti-human/mouse histone H3          | Cell Signaling Technology | Cat# 4499; RRID: AB_10544537      |
| Mouse anti-Flag tag                         | Sigma-Aldrich             | Cat# F3165; RRID: AB_259529       |

|                                                      |                           |                                         |
|------------------------------------------------------|---------------------------|-----------------------------------------|
| Rabbit anti-Flag tag                                 | Cell Signaling Technology | Cat# 14793; RRID: AB_2572291            |
| Mouse anti-Myc tag                                   | Cell Signaling Technology | Cat# 2276; RRID: AB_331783              |
| Rabbit anti-Gst tag                                  | Proteintech               | Cat# 10000-0-AP; RRID: AB_11042316      |
| Mouse anti-His tag                                   | Proteintech               | Cat# 66005-1-Ig; RRID: AB_11232599      |
| Mouse anti-human/mouse GAPDH                         | Proteintech               | Cat# 60004-1-Ig; RRID: AB_2107436       |
| Mouse anti-human alpha tubulin                       | Proteintech               | Cat# 66031-1-Ig; RRID: AB_11042766      |
| Normal rabbit IgG                                    | ABclonal                  | Catalog# AC005; RRID: AB_2771930        |
| Normal mouse IgG                                     | ABclonal                  | Catalog# AC011; RRID: AB_2770414        |
| HRP Rabbit anti-Chicken IgY (IgG) (H+L)              | ABclonal                  | Catalog# AS030; RRID: AB_2769858        |
| Peroxidase-AffiniPure Goat anti-Rabbit IgG (H+L)     | Jackson                   | Catalog# 111-035-003; RRID: AB_2313567  |
| Peroxidase-AffiniPure Goat Anti-Mouse IgG (H+L)      | Jackson                   | Catalog# 115-035-003; RRID: AB_10015289 |
| HRP AffiniPure Mouse Anti-Rabbit IgG Light Chain     | ABclonal                  | Cat# AS061; RRID: AB_2864055            |
| HRP AffiniPure Goat Anti-Mouse IgG Light Chain       | ABclonal                  | Cat# AS062; RRID: AB_2864056            |
| APC/Cyanine7 anti-mouse CD45                         | BioLegend                 | Cat# 103116; RRID: AB_312981            |
| PerCP/Cyanine5.5 anti-mouse CD3e                     | BioLegend                 | Cat# 100328; RRID: AB_893318            |
| Alexa Fluor® 700 anti-mouse CD4                      | BioLegend                 | Cat# 100536; RRID: AB_493701            |
| FITC anti-mouse CD8a                                 | BioLegend                 | Cat# 100706; RRID: AB_312745            |
| PE/Cyanine7 anti-human/mouse Granzyme B              | BioLegend                 | Cat# 372214; RRID: AB_2728381           |
| APC anti-mouse IFN- $\gamma$                         | BioLegend                 | Cat# 505810; RRID: AB_315404            |
| FITC anti-mouse IFN- $\gamma$                        | BioLegend                 | Cat# 505806; RRID: AB_315400            |
| PE anti-mouse CD137                                  | BioLegend                 | Cat# 106106; RRID: AB_2287565           |
| FITC anti-mouse H-2K <sup>d</sup> /H-2D <sup>d</sup> | BioLegend                 | Cat# 114706; RRID: AB_313605            |
| APC anti-mouse H-2K <sup>b</sup> bound to SIINFEKL   | BioLegend                 | Cat# 141606; RRID: AB_11219595          |
| <i>InVivoPlus</i> anti-mouse PD-1                    | BioXCell                  | Cat# BP0273; RRID: AB_2687796           |
| <i>InVivoPlus</i> rat IgG2a isotype control          | BioXCell                  | Cat# BP0089; RRID: AB_1107769           |
| FITC anti-human ICOS                                 | BioLegend                 | Cat# 313505; RRID: AB_416329            |

|                       |           |                              |
|-----------------------|-----------|------------------------------|
| PE anti-human CD137   | BioLegend | Cat# 309803; RRID: AB_314782 |
| APC anti-human CD25   | BioLegend | Cat# 302609; RRID: AB_314279 |
| Nivolumab (anti-PD-1) | Selleck   | Cat# A2002; RRID: AB_2810223 |

---
