# Supplementary material
Source: PubMed Central journal article supplement (PMC10770380)
Supplement: 41422_2023_909_MOESM25_ESM.pdf [file 41422_2023_909_MOESM25_ESM.pdf]

**Supplementary information, Table S9. ChIP-qPCR primers used in this study.**

| <b>Name</b> | <b>Primers</b> | <b>Sequences</b>          |
|-------------|----------------|---------------------------|
| LINE-1-PCR1 | Forward        | AAGATGGCCGAATAGGAACAG     |
|             | Reverse        | TTTGACTIONCGGAAAGGGAACTC  |
| LINE-1-PCR2 | Forward        | ACGAGACTATATCCCACACCT     |
|             | Reverse        | GCAGAGGTTACTGCTGTCTT      |
| LINE-1-PCR3 | Forward        | TGTCTGACAGCTTTGAAGAGAG    |
|             | Reverse        | TGGTCTTTGATGATGGTGATGTA   |
| LINE-1-PCR4 | Forward        | CGATGCGATCAACTGGAAG       |
|             | Reverse        | GGCCTGCCTTGCTAGATT        |
| LINE-1-PCR5 | Forward        | CAGAGACACACATAGGCTCAAA    |
|             | Reverse        | AATCTGGGTGCTCCTGTATTG     |
| LINE-1-PCR6 | Forward        | ACTCATCTGACAAAGGGCTAAT    |
|             | Reverse        | CCTATTTCTCCGCATCCTCTC     |
| LINE-1-PCR7 | Forward        | AATGAGATCACATGGACACAGGAAG |
|             | Reverse        | TGTATACATGTGCCATGCTGGTGC  |
