# Supplementary material
Source: PubMed Central journal article supplement (PMC10770380)
Supplement: 41422_2023_909_MOESM26_ESM.pdf [file 41422_2023_909_MOESM26_ESM.pdf]

**Supplementary information, Table S10. The sequencing coverage of datasets used in our study.**

| <b>Datasets</b> | <b>Average coverage (x)</b> |
|-----------------|-----------------------------|
| TCGA            | ~100                        |
| FUSCC TNBC      | 207                         |
| PDX tumor       | 252                         |
| LM2 tumor       | 259                         |
