# Supplementary material
Source: PubMed Central journal article supplement (PMC10770380)
Supplement: 41422_2023_909_MOESM27_ESM.pdf [file 41422_2023_909_MOESM27_ESM.pdf]

**Supplementary information, Table S11. Summary of quality control metrics for sequencing data used in this study.**

| <b>Sequence</b> | <b>Sample</b>  | <b>Replicate No.</b> | <b>Reads</b> | <b>Aligned reads</b> |
|-----------------|----------------|----------------------|--------------|----------------------|
|                 | PDX-1          | 1                    | 190645696    | 190441705            |
|                 | PDX-2          | 1                    | 192151036    | 191941591            |
|                 | PDX-3          | 1                    | 202751678    | 202534734            |
|                 |                | 1                    | 191661792    | 191615793            |
|                 |                | 2                    | 196997736    | 196958336            |
|                 | PDX1-siNC      | 3                    | 191097192    | 191057062            |
|                 |                | 4                    | 203905402    | 203825879            |
|                 |                | 5                    | 237071418    | 236978960            |
|                 |                | 6                    | 198729166    | 198667560            |
|                 |                | 1                    | 187059144    | 187006767            |
|                 |                | 2                    | 206351726    | 206271249            |
|                 | PDX1-siZNF689  | 3                    | 199283876    | 199228077            |
|                 |                | 4                    | 177301174    | 177237346            |
|                 |                | 5                    | 180004752    | 179952551            |
|                 |                | 6                    | 189391782    | 189327389            |
|                 |                | 1                    | 215009328    | 214925474            |
|                 |                | 2                    | 247901558    | 247824709            |
|                 | LM2-shNC       | 3                    | 200239644    | 200179572            |
|                 |                | 4                    | 204136164    | 204066758            |
| <b>WES</b>      |                | 5                    | 197753428    | 197676304            |
|                 |                | 6                    | 178902768    | 178832996            |
|                 |                | 1                    | 210330444    | 210254725            |
|                 |                | 2                    | 184431838    | 184387574            |
|                 | LM2-shZNF689-1 | 3                    | 215212464    | 215134988            |
|                 |                | 4                    | 212165448    | 212103920            |
|                 |                | 5                    | 175601386    | 175550462            |
|                 |                | 6                    | 211519948    | 211456492            |
|                 |                | 1                    | 220788104    | 220706412            |
|                 |                | 2                    | 186512158    | 186463665            |
|                 | LM2-shZNF689-2 | 3                    | 193303216    | 193239426            |
|                 |                | 4                    | 189030462    | 188943508            |
|                 |                | 5                    | 190509420    | 190456077            |
|                 |                | 6                    | 218719342    | 218649352            |
|                 |                | 1                    | 179238320    | 179184549            |
|                 |                | 2                    | 177746966    | 177690087            |
|                 | LM2-pCDH       | 3                    | 197063064    | 196996063            |
|                 |                | 4                    | 184635892    | 184567577            |
|                 |                | 5                    | 188062874    | 188021500            |
|                 |                | 6                    | 183224374    | 183163910            |

|                 |                       |   |           |           |
|-----------------|-----------------------|---|-----------|-----------|
|                 |                       | 1 | 204648290 | 204578710 |
|                 |                       | 2 | 184437536 | 184369294 |
|                 | LM2-                  | 3 | 186265728 | 186204260 |
|                 | ZNF689-OE             | 4 | 187962682 | 187887497 |
|                 |                       | 5 | 178238902 | 178197907 |
|                 |                       | 6 | 218915322 | 218834323 |
|                 |                       | 1 | 183937752 | 183884410 |
|                 |                       | 2 | 183334608 | 183255774 |
|                 | LM2-                  | 3 | 218039996 | 217978945 |
|                 | shNC+Veh              | 4 | 185071576 | 185010502 |
|                 |                       | 5 | 201343170 | 201292834 |
|                 |                       | 6 | 178332950 | 178268750 |
|                 |                       | 1 | 202728084 | 202667266 |
|                 |                       | 2 | 212615630 | 212543341 |
|                 | LM2-                  | 3 | 180261480 | 180212809 |
|                 | shZNF689+Veh          | 4 | 197806486 | 197733298 |
|                 |                       | 5 | 199824034 | 199772080 |
|                 |                       | 6 | 185835182 | 185762706 |
|                 |                       | 1 | 199103568 | 199043837 |
|                 |                       | 2 | 195780032 | 195731087 |
|                 | LM2-                  | 3 | 211655002 | 211589389 |
|                 | shNC+EFV              | 4 | 182580008 | 182523408 |
|                 |                       | 5 | 180947262 | 180894787 |
|                 |                       | 6 | 190948618 | 190887514 |
|                 |                       | 1 | 194970670 | 194925827 |
|                 |                       | 2 | 196902568 | 196835621 |
|                 | LM2-                  | 3 | 191726740 | 191680726 |
|                 | shZNF689+EFV          | 4 | 186206136 | 186142826 |
|                 |                       | 5 | 186271306 | 186217287 |
|                 |                       | 6 | 195181982 | 195123427 |
|                 |                       | 1 | 73048914  | 70716141  |
|                 | LM2-siNC              | 2 | 79309198  | 76967972  |
|                 |                       | 3 | 79711624  | 77336715  |
| <b>RNA-seq</b>  |                       | 1 | 68790274  | 66455721  |
|                 | LM2-siZNF689          | 2 | 78092984  | 75676551  |
|                 |                       | 3 | 66787876  | 64522407  |
|                 | Flag-ZNF689 in        | 1 | 60659798  | 58080398  |
|                 | Flag-ZNF689 LM2 cells |   |           |           |
|                 | TRIM28 in             | 1 | 68667196  | 66157672  |
|                 | Flag-ZNF689 LM2 cells |   |           |           |
| <b>ChIP-seq</b> | H3K9me3 in            | 1 | 62594178  | 60152170  |
|                 | Flag-ZNF689 LM2 cells |   |           |           |
|                 | H3K9me3 in            | 1 | 57539604  | 55328108  |
|                 | shNC LM2 cells        |   |           |           |

|                 |                                  |   |          |          |
|-----------------|----------------------------------|---|----------|----------|
|                 | H3K9me3 in<br>shZNF689 LM2 cells | 1 | 65857464 | 62984436 |
|                 | TRIM28 in<br>shNC LM2 cells      | 1 | 60235132 | 58220138 |
|                 | TRIM28 in<br>shZNF689 LM2 cells  | 1 | 80405594 | 78028834 |
| <b>ATAC-seq</b> | LM2-shNC                         | 1 | 47049558 | 45801866 |
|                 | LM2-shZNF689                     | 1 | 63292906 | 62055314 |

---
